# Supplementary material
Source: PubMed Central journal article supplement (PMC5292276)
Supplement: NIHMS822667-supplement-01.pdf [file NIHMS822667-supplement-01.pdf]

349 **Supplemental Table 1.** Additional multivariate linear regressions with different combinations of  
350 variables.

### Multivariate Regression Results

|                                               | 6 Month Analysis       |                        | 12 Month Analysis       |                         |
|-----------------------------------------------|------------------------|------------------------|-------------------------|-------------------------|
|                                               | (3 variables)          | (6 variables)          | (3 variables)           | (6 variables)           |
| Time on T<br>(years)                          | -0.0568***<br>(0.0110) | -0.0555***<br>(0.0108) | -0.0330***<br>(0.0115)  | -0.0306**<br>(0.0124)   |
| Age                                           | -0.0128**<br>(0.00593) | -0.0163**<br>(0.00674) | -0.0154***<br>(0.00576) | -0.0171**<br>(0.00684)  |
| Cryptospermic                                 | 0.167<br>(0.129)       | 0.184<br>(0.127)       | 0.190*<br>(0.109)       | 0.218*<br>(0.112)       |
| Initial T                                     |                        | 0.000196<br>(0.000143) |                         | 0.0000223<br>(0.000132) |
| Clomiphene<br>citrate                         |                        | -0.0641<br>(0.120)     |                         | 0.00936<br>(0.114)      |
| Testosterone Type<br>(Ref: <i>Injection</i> ) |                        |                        |                         |                         |
| <i>Transdermal</i>                            |                        | 0.0451<br>(0.130)      |                         | 0.124<br>(0.131)        |
| <i>Pellet</i>                                 |                        | 0.177<br>(0.126)       |                         | 0.163<br>(0.136)        |
| Constant                                      | 1.361***<br>(0.233)    | 1.369***<br>(0.308)    | 1.407***<br>(0.217)     | 1.377***<br>(0.288)     |
| N                                             | 59                     | 59                     | 66                      | 66                      |
| R <sup>2</sup>                                | 0.302                  | 0.340                  | 0.277                   | 0.297                   |

Robust standard errors in parenthesis

\* p<0.1, \*\* p<0.05, \*\*\* p<0.01
